# Supplementary material for: Deep eutectic solvents for green and efficient iron-mediated ligand-free atom transfer radical polymerization
Source: Royal Society of Chemistry journal article supplement (doi:10.1039/c6py02066f), 2017-01-01
Supplement: c6py02066f1.pdf [file c6py02066f1.pdf]

Supporting Information for

# Deep eutectic solvents for green and efficient iron-mediated ligand-free atom transfer radical polymerization

Jirong Wang<sup>a</sup>, Jianyu Han<sup>a</sup>, Mohd Yusuf Khan<sup>b</sup>, Dan He<sup>c</sup>, Haiyan Peng<sup>a</sup>, Dianyu Chen<sup>d\*</sup>, Xiaolin Xie<sup>a</sup> and

Zhigang Xue<sup>a\*</sup>

\*Correspondence to: [zgxue@mail.hust.edu.cn](mailto:zgxue@mail.hust.edu.cn); [chendy@cslg.cn](mailto:chendy@cslg.cn)

## Polymerization Data:

**Table. S1** The chemical shifts with different ratios of DESs.

| DESs                   | Chemical shift (ppm) |       |       |       |       |       |     |
|------------------------|----------------------|-------|-------|-------|-------|-------|-----|
|                        | 0:3                  | 1:3   | 2:3   | 3:4   | 3:2   | 3:1   | 3:0 |
| <sup>a</sup> TBABr:Gly | 4.498                | 4.489 | 4.483 | 4.478 | 4.476 | 4.474 | NA  |
| <sup>b</sup> Ac:KSCN   | 7.354                | 7.335 | 7.306 | 7.305 | 7.298 | 7.294 | NA  |
| <sup>c</sup> CPL:Ac    | 6.731                | 6.720 | 6.706 | 6.704 | 6.698 | 6.694 | NA  |

<sup>a</sup>The chemical shifts of OH in Glycerol; <sup>b</sup>The chemical shifts of NH<sub>2</sub> in Acetamide; <sup>c</sup>The chemical shifts of NH<sub>2</sub> in Acetamide.

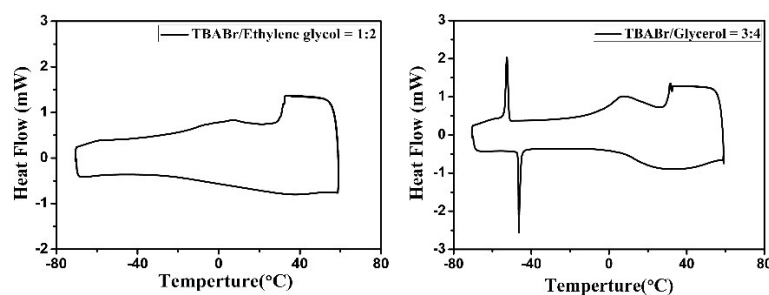

**Figure S1.** Melting point of TBABr:EG 1:2 and TBABr:Gly 3:4 detected by differential scanning calorimetry (DSC).

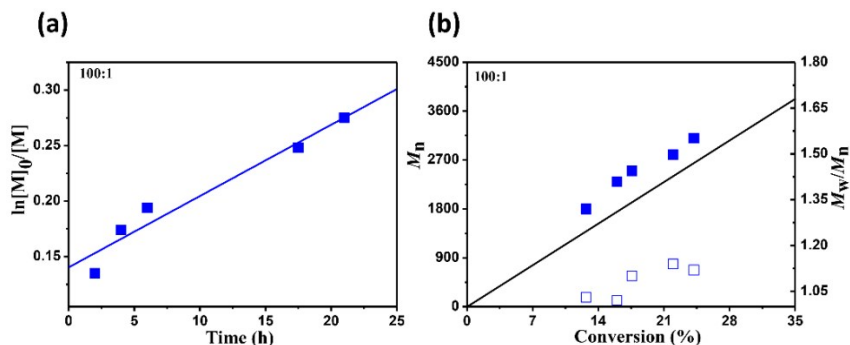

**Figure S2.**  $\ln([M]_0/[M])$  as a function of time (a) and evolution of number-average molecular weight ( $M_{n, GPC}$ ) and molecular weight distribution ( $M_w/M_n$ ) versus conversion (b) for ATRP of MMA with trace amount of DES. Polymerization conditions (a)  $[MMA]_0:[FeBr_2]_0:[EBPA]_0 = 100:1:1$ ,  $MMA/DES(v/v) = 100:1$  without any additional ligand, 60 °C.

**Table. S2** Redox potentials of  $FeBr_2$  with different types of additives measured in methanol.

| entry | Additives     | $E_{pc}$ (V) | $E_{pa}$ (V) | $\Delta E_p$ (V) | $E_{1/2}$ (V) |
|-------|---------------|--------------|--------------|------------------|---------------|
| 1     | EG            | 0.752        | 0.999        | 0.247            | 0.876         |
| 2     | Urea          | 0.754        | 0.997        | 0.243            | 0.875         |
| 3     | TBABr/EG      | 0.756        | 0.994        | 0.238            | 0.873         |
| 4     | ChCl/EG       | 0.798        | 0.940        | 0.142            | 0.869         |
| 5     | Urea/CPL      | 0.751        | 1.005        | 0.254            | 0.878         |
| 6     | Urea/Acetamid | 0.765        | 0.991        | 0.226            | 0.878         |

e

$[FeBr_2]_0/[Additives]_0 = 1:2$ ,  $DES = 64 \mu L$ .  $E_{pa}$  and  $E_{pc}$  are the peak potentials of the oxidation and reduction waves, respectively.  $\Delta E_p = E_{pa} - E_{pc}$ ,  $E_{1/2} = (E_{pa} + E_{pc})/2$ .

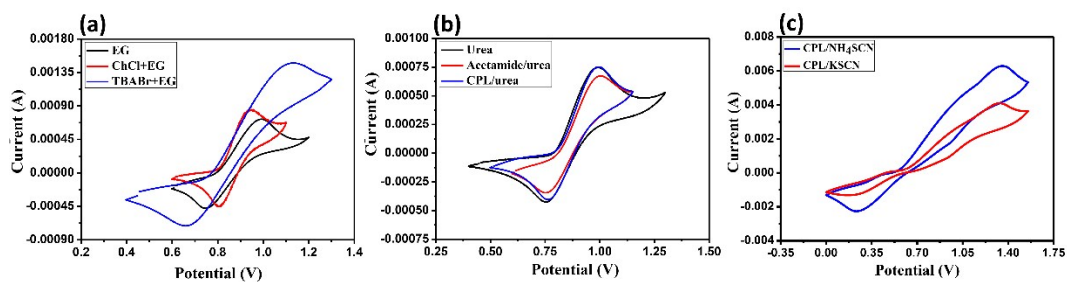

**Figure S3.** Cyclic voltammograms (50mV/s) of FeBr<sub>2</sub> (1.2mM) with different types of additives as the ligands in methanol at room temperature. [Et<sub>4</sub>NBF<sub>4</sub>] = 0.1M (supporting electrolyte). [DES]<sub>0</sub> = 64 uL, [FeBr<sub>2</sub>]<sub>0</sub>/[additives] = 1:2.
